# Supplementary material
Source: publisher figshare collection journal article supplement (https://tandf.figshare.com/articles/dataset/_/1569745)

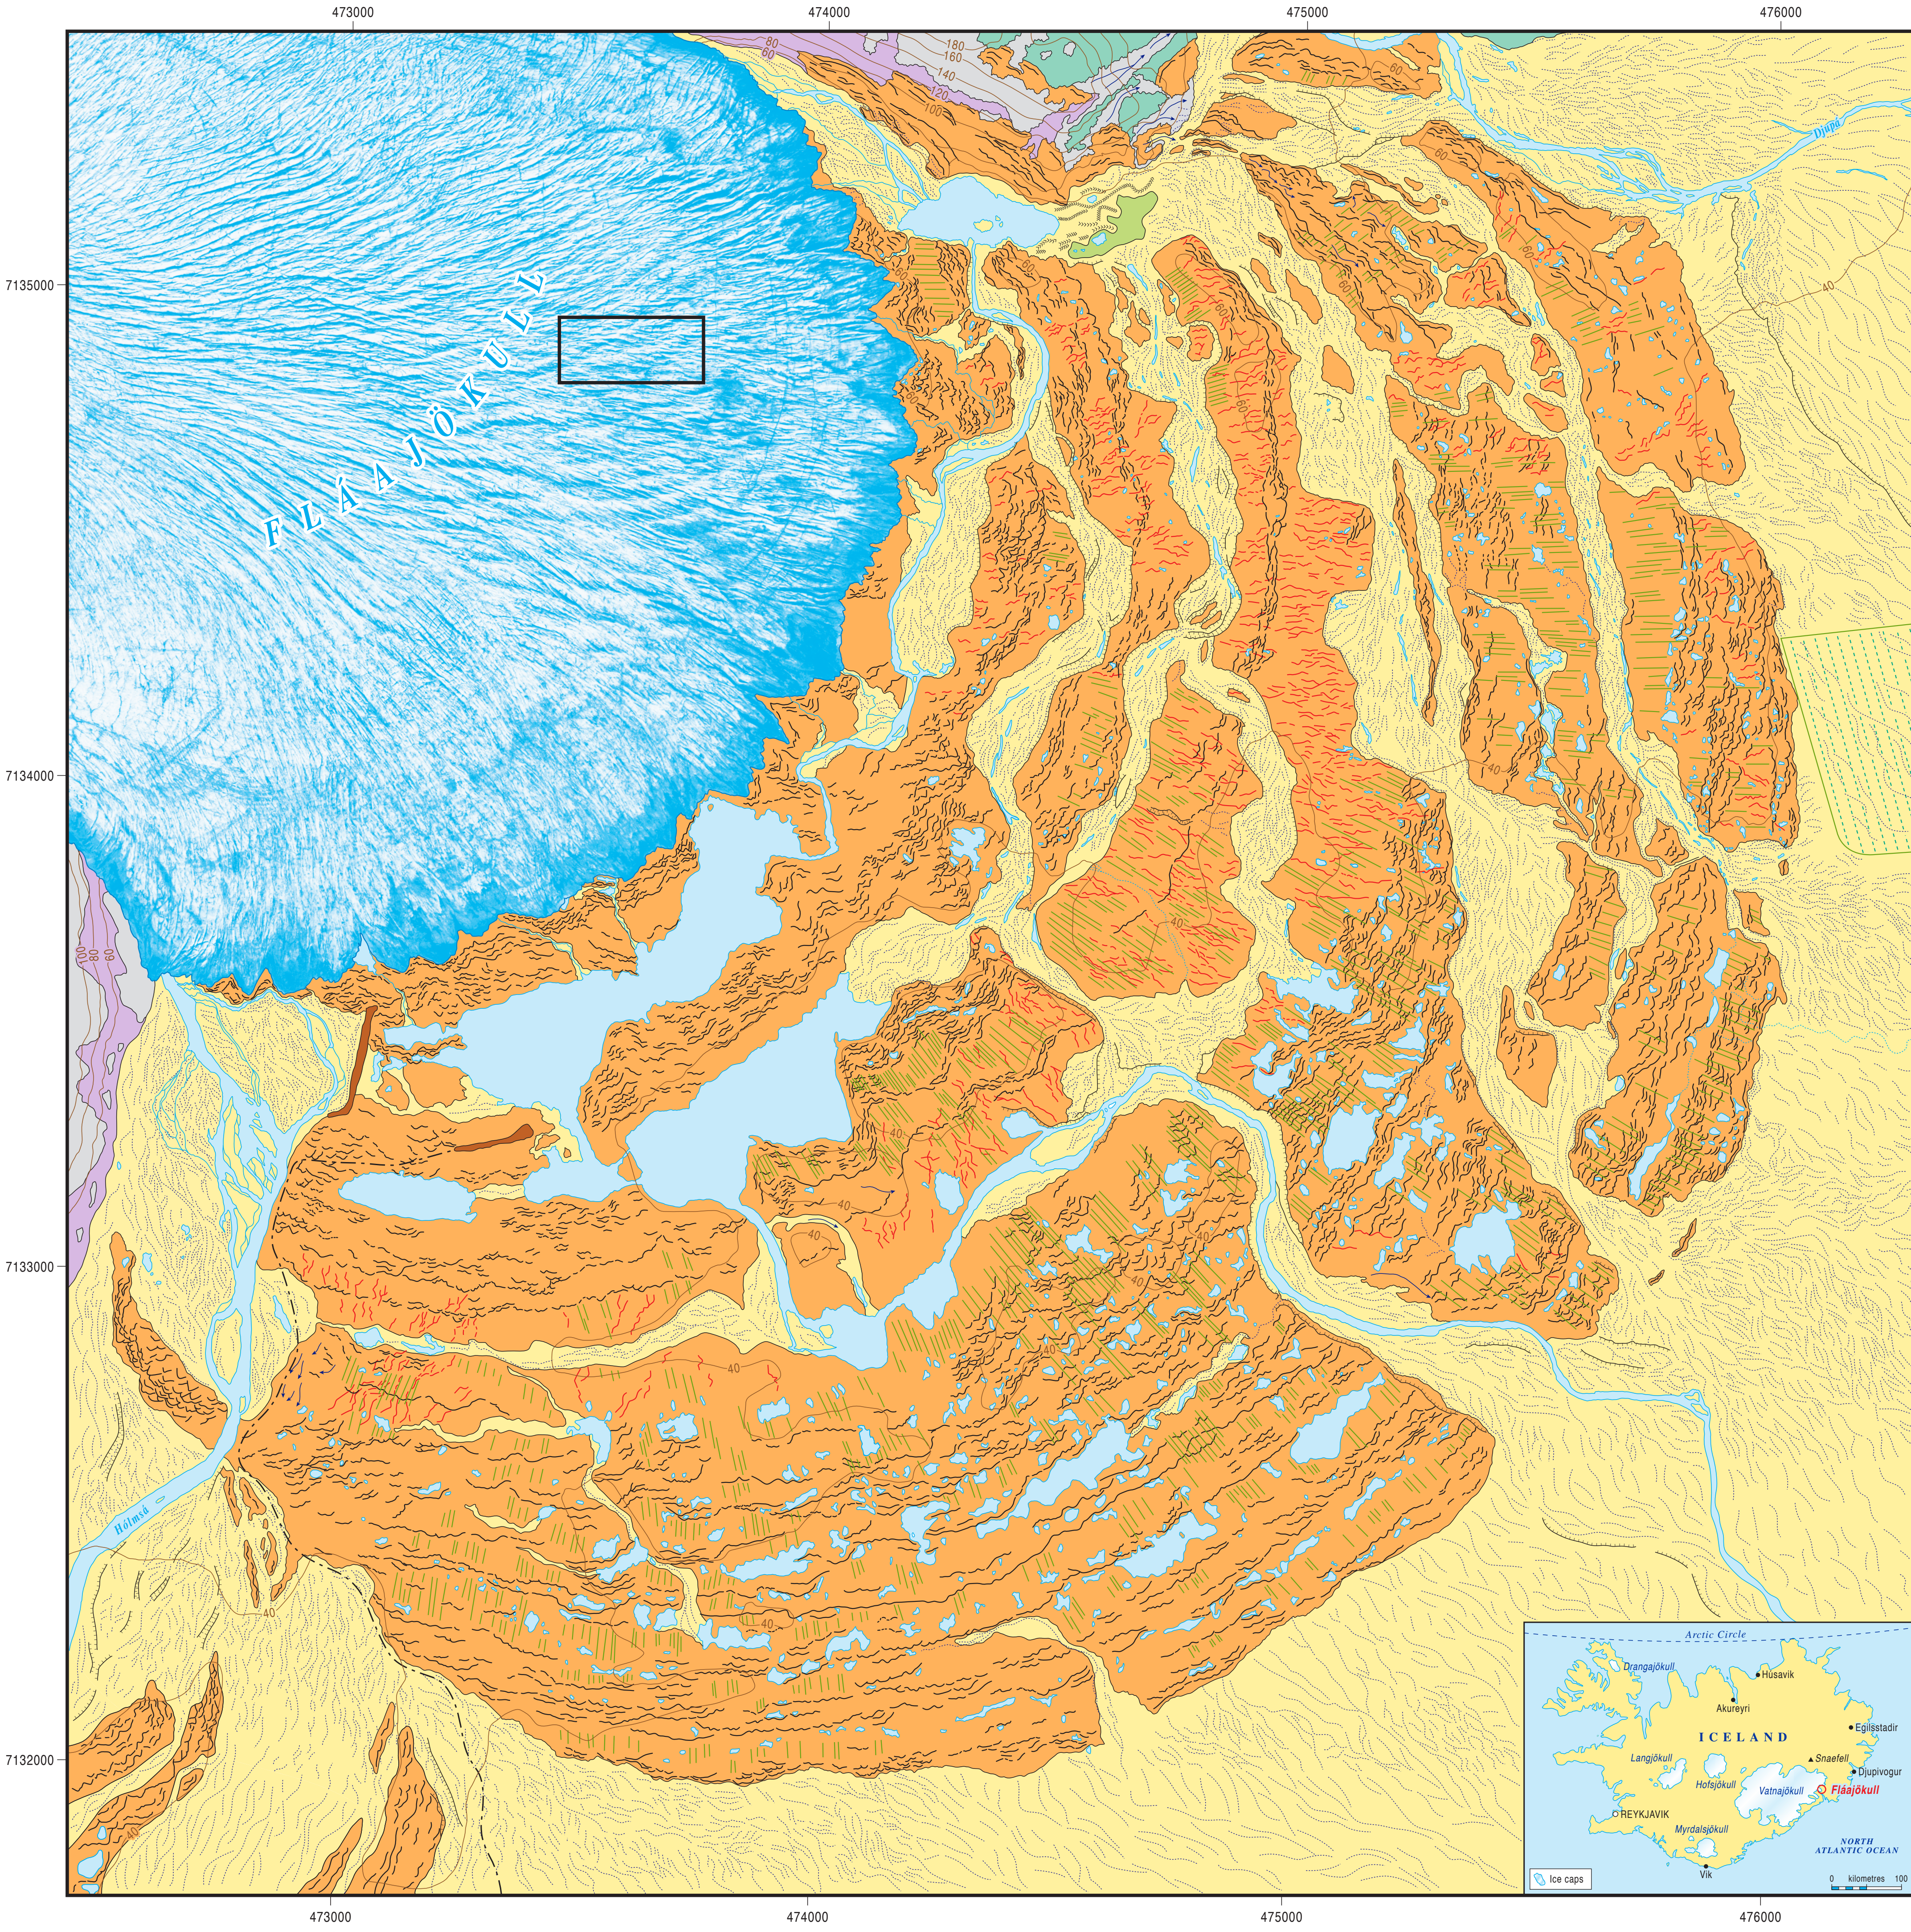

# FLÁAJÖKULL (NORTH LOBE), ICELAND: Active temperate piedmont lobe glacial landsystem

DAVID J.A. EVANS, MAREK EWERTOWSKI  
and CHRIS ORTON  
Department of Geography, Durham University, UK

- Glacifluvial deposits, including eskers
- Till and moraines dating to the Little Ice Age (superimposed on overridden moraines)
- Residuum or weathered bedrock, and areas of weathered pre-Little Ice Age till (including areas of aeolian deposits and peat)
- Glacilacustrine deposits
- Made ground
- Paraglacial deposits, small bedrock exposures and debris flow fans and scree
- Bedrock (including small patches of residuum and thin till)
- Glacier ice
- Flutings
- Relict channels
- Lakes and kettle holes
- Rivers
- Major terrace
- Meltwater channels
- Esker
- Moraine ridges
- Crevasse fills and minor till eskers
- Contours (20m intervals)
- Track
- Crop patterns
- Field boundaries
- Location of 1:350 scale map

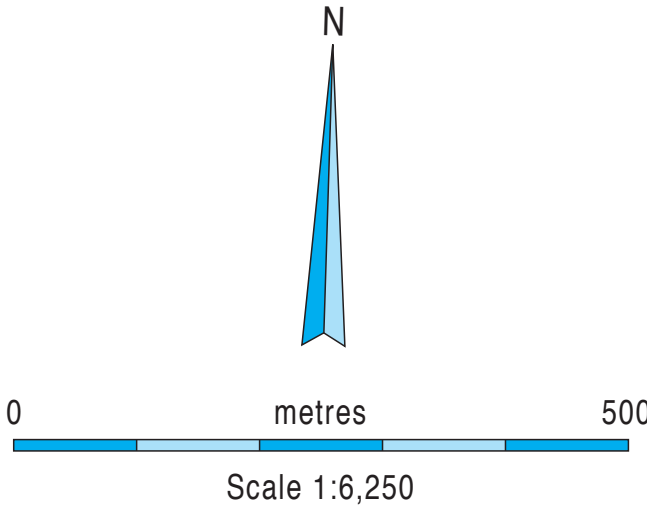

Based on aerial photography by  
Landmælingar Islands, July 1989.

UTM 28N Projection

Contour interval: 20m  
(based on ISN 93 datum)  
Lambert Projection

Map to accompany paper:  
Evans D.J.A., Ewertowski M and Orton C. (2014)  
Fláajökull, Iceland:  
Active temperate peidmont lobe glacial landsystem.

© Journal of Maps, 2014.

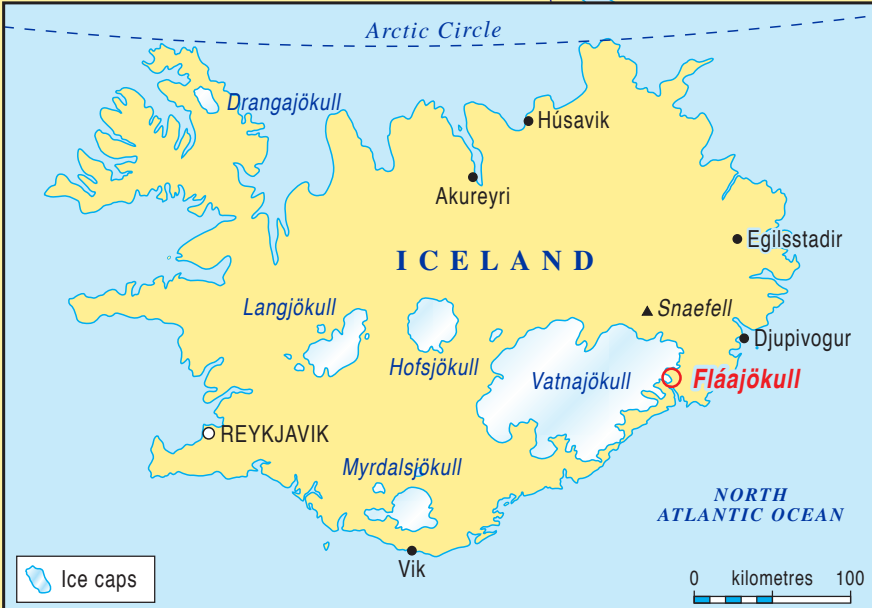

Supplement: Supplementary file 2 [file 1]
